# Supplementary material for: Human adenovirus-specific T cells modulate HIV-specific T cell responses to an Ad5-vectored HIV-1 vaccine
Source: JCI journal article supplement (doi:10.1172/jci60202), 2011-12-27
Supplement: sd1 [file 1]

# Human adenovirus-specific T cells modulate HIV-specific T-cell responses to an Ad5-vectored HIV-1 vaccine

Nicole Frahm<sup>1,2</sup>, Allan C. DeCamp<sup>1</sup>, David P. Friedrich<sup>1</sup>, Donald K. Carter<sup>1</sup>, Olivier D. Defawe<sup>1</sup>, James G. Kublin<sup>1</sup>, Danilo R. Casimiro<sup>5</sup>, Ann Duerr<sup>1</sup>, Michael N. Robertson<sup>5</sup>, Susan P. Buchbinder<sup>6</sup>, Yunda Huang<sup>1</sup>, Gregory A. Spies<sup>1</sup>, Stephen C. De Rosa<sup>1,3</sup>, M. Juliana McElrath<sup>1,2,3,4</sup>.

<sup>1</sup>Vaccine and Infectious Disease Division and the HIV Vaccine Trials Network, Fred Hutchinson Cancer Research Center, <sup>2</sup>Department of Global Health, <sup>3</sup>Department of Laboratory Medicine and <sup>4</sup>Department of Medicine, University of Washington, <sup>5</sup>Merck Research Laboratories, West Point, PA, HIV Research Section, <sup>6</sup>San Francisco Department of Public Health, San Francisco, CA, USA

## Supplemental methods

### **IFN- $\gamma$ ELISpot**

For the ELISpot assays, PBMCs were plated in 96-well Immobilon-P plates (Millipore), which had been precoated overnight with 10  $\mu\text{g/ml}$  of  $\alpha\text{IFN-}\gamma$  monoclonal antibody (mAb) 1-D1K (Mabtech). 100,000 cells/well were added in 100  $\mu\text{l}$  of R10 [RPMI 1640 containing 10% heat-inactivated FBS, 2 mM L-glutamine, 200 U/ml penicillin, and 200  $\mu\text{g/ml}$  streptomycin (all but FBS from Invitrogen; FBS from Gemini Bio-Products)]. For negative controls, cells were incubated in medium alone. For positive controls, 0.5  $\mu\text{g/ml}$  phytohemagglutinin (Murex Biotech) was added. Cells were incubated overnight at 37 °C with 5% CO<sub>2</sub>. Plates were developed by washing seven times with 0.05% Tween-20 (Sigma-Aldrich) in phosphate buffered saline (DPBS, no Ca & Mg, Invitrogen); then 1  $\mu\text{g/ml}$  of biotinylated  $\alpha\text{IFN-}\gamma$  Mab 7-B6-1 (Mabtech) was added for 2-5 hours at room temperature. Plates were washed four times and incubated with a 1:750 dilution of streptavidin-coupled alkaline phosphatase (Mabtech) for 2 hours at room temperature in

the dark. Plates were washed again and IFN- $\gamma$  production was detected as blue spots after a short incubation with nitroblue tetrazolium (NBT) and 5-bromo-4-chloro-3-indolyl phosphate (BCIP, Pierce). The color reaction was stopped by washing plates with tap water. The number of spots was counted using the CTL ELISpot Reader Unit (Cellular Technology Ltd.) and results were expressed as spot forming cells (SFC) per million input cells.

### **Intracellular Cytokine Staining**

Cryopreserved PBMC samples were thawed and incubated overnight before stimulation as previously described (1). Briefly, PBMCs were stimulated by incubation with 10,000 Ad5 empty vector particles (vector not expressing HIV transgenes) per cell for 24 hours at 37°C in the presence of  $\alpha$ CD28 and  $\alpha$ CD49d antibodies (BD Biosciences). Brefeldin A (Sigma-Aldrich) was added after 6 hours of stimulation. Vector dilution buffer (GTS buffer: 20mM Tris HCl, 25mM NaCl, 2.5% glycerol, pH8.1) was used as negative control. Intracellular cytokine staining (ICS) was performed using a previously-validated eight-color protocol (2) or a cross-validated ten-color protocol as described (1). Ad5-specific responses were considered positive based on previously described criteria (2). Subjects with high background responses in the negative control (>0.1% of T-cells expressing IFN- $\gamma$  or IL2) were excluded from the analysis. Representative examples for Ad5-specific CD4<sup>+</sup> and CD8<sup>+</sup> T-cell immune responses are shown in **Supplemental Figure 1**.

### **Ad5 and HIV peptide pool-specific immune responses**

Cryopreserved PBMC samples were thawed and incubated overnight before stimulation as previously described (1). PBMCs were stimulated by incubation with 1  $\mu$ g/ml of peptide pools in the presence of Brefeldin A and  $\alpha$ CD28 and  $\alpha$ CD49d antibodies for 6 hours at 37°C. Duplicate wells of PBMCs incubated in media with 0.5% DMSO were used as a negative control, while PBMCs stimulated with SEB or a CMV peptide pool (15-mer peptides overlapping by 11 amino acids spanning pp65) were used as positive controls. Cells were stained with the ten-color ICS protocol (described above).

## **Adenovirus Neutralizing Antibody Assays**

Ad5 nAb titers were measured as previously described (3). To determine Ad1 and Ad2 nAb titers, serial 1:4 dilutions of serum from 1:18 to 1:4608 were incubated with  $1.25 \times 10^7$  viral particles of wild-type adenovirus serotypes 1 (ATCC# VR-1) or 2 (ATCC# VR-846) for one hour. The neutralization mixtures were then transferred to Human Embryonic Kidney (HEK) 293 cell monolayers in 96-well plates and incubated for one hour. Following infection, complete DMEM medium was added to the cells and the plates were incubated for 48 hours in a tissue culture incubator. The cell monolayers were then washed, fixed with 100% methanol and stained with a 1:1000 dilution of hexon-specific antibody that binds to both Ad1 and Ad2 hexon (Genway). Infected cells were visualized by a secondary peroxidase-conjugated antibody (BD Biosciences) followed by incubation with 3,3'-diaminobenzidine (DAB, Sigma-Aldrich). The infected cells were counted on a CTL Immunospot reader. Titers were measured as the inverse of the 50% neutralization endpoint.

## Supplemental Figure 1. Representative examples for Ad5 vector-specific CD4<sup>+</sup> and CD8<sup>+</sup> T-cell responses.

Cytokine secretion after 24h stimulation with the empty Ad5 vector is shown for an Ad5 Ad5-seronegative placebo recipient (top panel) and Ad5-seropositive vaccine recipient (bottom panel) from the Step Study.

# CD4<sup>+</sup> T cells

# CD8<sup>+</sup> T cells

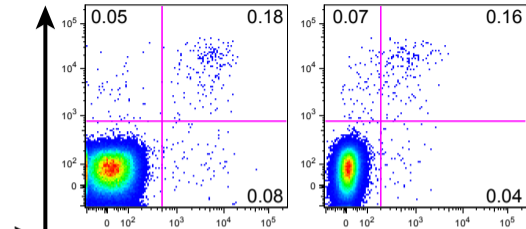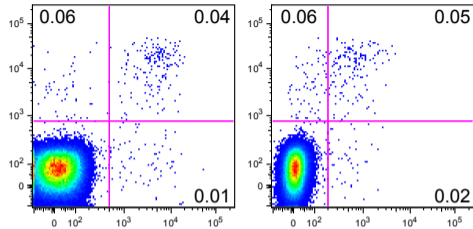

**Donor 1**  
Ad5  $\leq 18$

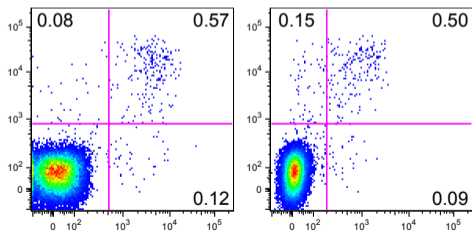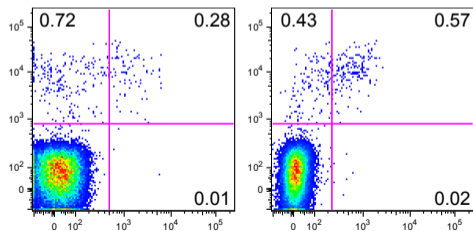

**Donor 2**  
Ad5  $>4806$

IL-2

TNF- $\alpha$

IL-2

TNF- $\alpha$

**Supplemental Figure 2. Correlation of Ad5-specific T-cell responses measured by stimulation with empty vector and peptide pools.**

Background-adjusted CD4<sup>+</sup> (A) and CD8<sup>+</sup> (B) Ad5-specific T-cell responses measured by stimulation with empty Ad5 vector (x-axis) or peptide pools (y-axis) are shown for 102 Step study participants. The magnitude of Ad5-specific T-cell responses detected using empty vector stimulation versus the sum of magnitudes measured by stimulation with Ad5 peptide pools were highly correlated for CD4<sup>+</sup> (A;  $\rho=0.7$ ,  $p<0.0001$ , Spearman rank correlation) and CD8<sup>+</sup> T cells (B;  $\rho=0.8$ ,  $p<0.0001$ ), although the regression line slopes indicate moderately higher magnitudes of responding cells detected by the peptide pools (CD4 slope=1.6, CD8 slope=1.2). This difference could be due to a higher density of

MHC-peptide complexes following incubation with peptides compared to that achieved after intracellular processing of vector particles.

**A**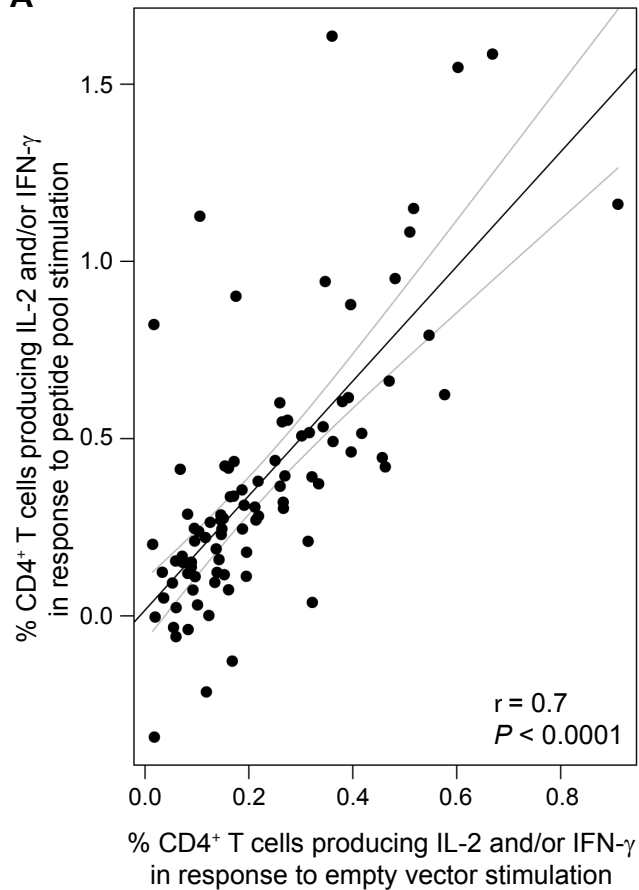**B**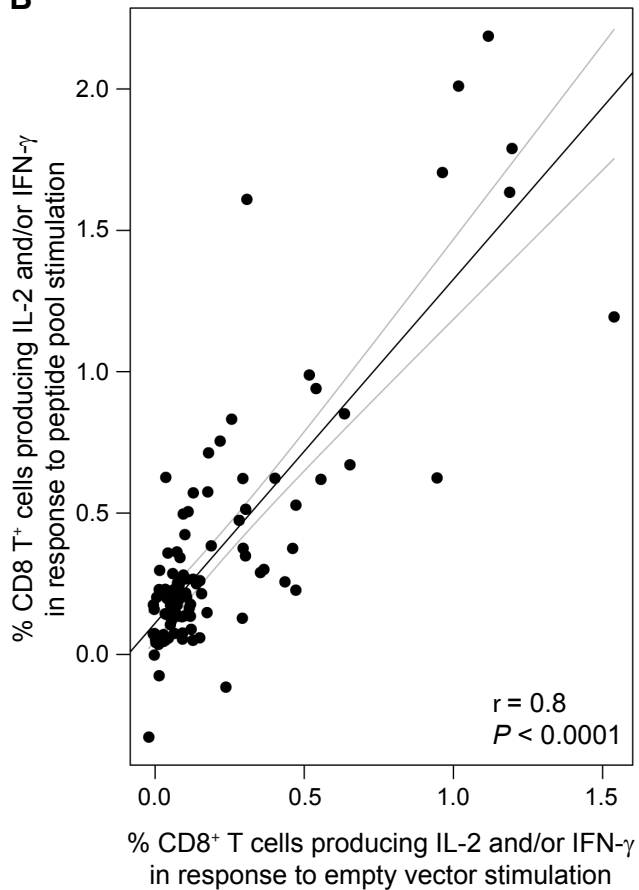



**Supplemental Table 1. Ad5 peptide distribution in protein pools.**

| <b>Protein</b>                 | <b># peptides</b> | <b># pools</b> | <b># peptides per pool</b> |
|--------------------------------|-------------------|----------------|----------------------------|
| hexon                          | 266               | 2              | 133                        |
| penton                         | 159               | 1              | 159                        |
| fiber                          | 161               | 1              | 161                        |
| pV                             | 100               | 1              | 152                        |
| pVII                           | 52                |                |                            |
| 100K                           | 282               | 2              | 141                        |
| E2 DNA polymerase (pol)        | 300               | 2              | 150                        |
| E2 preterminal protein (pTP)   | 186               | 2              | 166                        |
| E2 ssDNA binding protein (DBP) | 146               |                |                            |
| E3 gp19                        | 43                | 1              | 121                        |
| E4 orf 6                       | 78                |                |                            |
| <b>Total</b>                   | <b>1773</b>       | <b>12</b>      |                            |

**Supplemental Table 2. Ad5 hexon-specific responses.**

| <b>Protocol</b> | <b>PTID</b> | <b>Ad5 nAb titer</b> | <b>Sequence</b> | <b>SFC/million</b> |
|-----------------|-------------|----------------------|-----------------|--------------------|
| HVTN 071        | 121360037   | 431                  | PQKFFAIKNLLLL   | 178                |
|                 |             | 431                  | GSYTYEWNFRKDVNM | 193                |
| HVTN 071        | 123360032   | 4103                 | PQKFFAIKNLLLL   | 223                |
| HVTN 071        | 123360058   | <18                  | KKFLCDRTLWRIPF  | 78                 |
|                 |             | <18                  | LTDLGQNLLYANSAH | 438                |

| Protocol | PTID      | Ad5 nAb titer | Sequence         | SFC/million |
|----------|-----------|---------------|------------------|-------------|
| HVTN 071 | 125360010 | <18           | PQKFFAIKNLLLL    | 143         |
|          |           | <18           | KFFAIKNLLLLPGSY  | 618         |
|          |           | <18           | PSRNWAAFRGWAFTR  | 103         |
|          |           | <18           | PSLGSGYDPYYTY    | 78          |
|          |           | <18           | YDPYYTYSGSIPYL   | 103         |
|          |           | <18           | YYTYSGSIPYLDGTF  | 93          |
| HVTN 071 | 126360012 | <18           | GSYTYEWNFRKDVNM  | 133         |
| HVTN 071 | 126360047 | <18           | SMMPQWSYMHISGQDA | 80          |
|          |           | <18           | WSYMHISGQDASEYL  | 65          |
| HVTN 071 | 126360051 | <18           | ESYKDRMYSFFRNF   | 80          |
|          |           | <18           | WSYMHISGQDASEYL  | 60          |
|          |           | <18           | MPNRPNYIAFRDNFI  | 135         |
|          |           | <18           | PNYIAFRDNFIGLMY  | 90          |
|          |           | <18           | IGDRTRYFSMWNQAV  | 155         |
|          |           | <18           | TRYFSMWNQAVDSY   | 135         |
|          |           | <18           | NHHRNAGLRYSMLL   | 105         |
|          |           | <18           | NAGLRYSMLLGNGR   | 70          |
|          |           | <18           | PQKFFAIKNLLLL    | 50          |
| HVTN 071 | 126360070 | <18           | LLLPGSYTYEWNFRK  | 173         |
|          |           | <18           | GSYTYEWNFRKDVNM  | 83          |
|          |           | <18           | GTFYLNHTFKKVAI   | 63          |
| HVTN 071 | 126360104 | <18           | GTFYLNHTFKKVAI   | 68          |
| HVTN 071 | 126360133 | 707           | FARATETYFSLNNKF  | 65          |
|          |           | 707           | ETYFSLNNKFRNPTV  | 90          |
|          |           | 707           | TRYFSMWNQAVDSY   | 60          |
| HVTN 071 | 126360133 | 707           | GLVDCYINLGARWSL  | 75          |
|          |           | 707           | IQVPQKFFAIKNLLLL | 100         |
|          |           | 707           | PQKFFAIKNLLLL    | 50          |
|          |           | 707           | LTDLGQNLLYANSAH  | 260         |
|          |           | 707           | PTLLYVLFVFDVVR   | 95          |
| HVTN 071 | 126360157 | <18           | YSGINITKEGIQIGV  | 78          |
|          |           | <18           | MPNRPNYIAFRDNFI  | 158         |
|          |           | <18           | PNYIAFRDNFIGLMY  | 198         |
|          |           | <18           | GLMYYNSTGNMGVLA  | 103         |
|          |           | <18           | NNFAMEINLNANLWR  | 63          |

| Protocol | PTID   | Ad5 nAb titer | Sequence        | SFC/million |
|----------|--------|---------------|-----------------|-------------|
|          |        | <18           | CYINLGARWSLDYM  | 58          |
|          |        | <18           | IQVPQKFFAIKLLLL | 98          |
|          |        | <18           | PQKFFAIKLLLL    | 88          |
|          |        | <18           | VDGASIKFDSICLYA | 73          |
|          |        | <18           | SIKFDSICLYATFF  | 63          |
|          |        | <18           | PMSRQVVDDTKYKDY | 88          |
|          |        | <18           | PLIGKTAVDSITQKK | 93          |
|          |        | <18           | LTDLGQNLLYANSAH | 468         |
|          |        | <18           | LYANSAHALDMTFEV | 98          |
|          |        | <18           | PTLLYVLFEVFDVVR | 173         |
| SAC      | 205585 | 1579          | PQKFFAIKLLLL    | 58          |
|          |        | <18           | GPTFKPYSGTAYNAL | 75          |
|          |        | <18           | MPNRPNYIAFRDNFI | 315         |
|          |        | <18           | PNYIAFRDNFIGLMY | 445         |
|          |        | <18           | LDSIGDRTRYFSMW  | 65          |
|          |        | <18           | IGDRTRYFSMWNQAV | 280         |
|          |        | <18           | TRYFSMWNQAVDSY  | 280         |
| SAC      | 214817 | <18           | GLVDCYINLGARWSL | 65          |
|          |        | <18           | CYINLGARWSLDYM  | 90          |
|          |        | <18           | IQVPQKFFAIKLLLL | 175         |
|          |        | <18           | PQKFFAIKLLLL    | 215         |
|          |        | <18           | YDPYYTYSGSIPYL  | 115         |
|          |        | <18           | YYTYSGSIPYLDGTF | 85          |
|          |        | <18           | AQCNMTKDWFLVQML | 55          |
|          |        | <18           | PMDEPTLLYVLFEVF | 75          |
|          |        | <18           | PTLLYVLFEVFDVVR | 115         |
| SAC      | 215051 | 805           | PQKFFAIKLLLL    | 195         |
|          |        | 805           |                 | 55          |
| SAC      | 224600 | >4608         | GSYTYEWNFRKDVNM | 80          |
| SAC      | 228071 | <18           | MPNRPNYIAFRDNFI | 83          |
|          |        | <18           | YDPYYTYSGSIPYL  | 353         |
|          |        | <18           | YYTYSGSIPYLDGTF | 288         |
| SAC      | 246728 | 2627          | PNYIAFRDNFIGLMY | 55          |
|          |        | 2627          | YDPYYTYSGSIPYL  | 95          |
|          |        | 2627          | YYTYSGSIPYLDGTF | 95          |
|          |        | 2627          | PMDEPTLLYVLFEVF | 55          |

| Protocol | PTID   | Ad5 nAb titer | Sequence           | SFC/million |
|----------|--------|---------------|--------------------|-------------|
| SAC      | 274012 | <18           | GQQSMPNRPNYIAFR    | 98          |
|          |        | <18           | MPNRPNYIAFRDNFI    | 68          |
|          |        | <18           | QASQLNAVVDLQDRNTEL | 53          |
|          |        | <18           | VVDLQDRNTELSYQL    | 58          |
|          |        | <18           | LQDRNTELSYQLL      | 68          |
|          |        | <18           | FSMWNQAVDSYDPDV    | 123         |
|          |        | <18           | NFLYSNIALYLPDKL    | 53          |
|          |        | <18           | PQKFFAIKNLLLL      | 63          |
|          |        | <18           | GSYTYEWNFRKDVNM    | 238         |
|          |        | <18           | PMDEPTLLYVLFEVF    | 73          |
|          |        | <18           | PTLLYVLFEVFDVVR    | 108         |
| SAC      | 291114 | 117           | ESYKDRMYSFFRNF     | 58          |
|          |        | 117           | MYSFFRNFQPMSRQV    | 63          |
|          |        | 117           | PTLLYVLFEVFDVVR    | 68          |
| SAC      | 298998 | 45            | IGDRTRYFSMWNQAV    | 58          |
|          |        |               | CYINLGARWSLDYM     | 68          |

**Supplemental Table 3. Ad1/Ad2 hexon-specific responses.**

| Protocol | PTID             | Ad1/Ad2 | Sequence               | SFC/million |
|----------|------------------|---------|------------------------|-------------|
| HVTN 071 | 123360058        | Ad1     | GALESKVEMQFF           | 85          |
| SAC      | 205585           | Ad1     | SCEWEQEEPTQEMAE        | 63          |
|          |                  | Ad1     | TPMKPCYGSYAR           | 93          |
|          |                  | Ad1     | ANNQGALESKVEMQF        | 53          |
|          |                  | Ad1     | ALESKVEMQFFAPSGT       | 53          |
|          |                  | Ad2     | LSGETITKSQLQIGS        | 53          |
| SAC      | 214817           | Ad1     | ANNQGALESKVEMQF        | 93          |
|          |                  | Ad1     | EQEEPTQEMAELEDEE       | 85          |
|          |                  | Ad1     | PTQEMAELEDEEEAEE       | 95          |
|          |                  | Ad1     | LAGEKITANGLQIVS        | 55          |
|          |                  | Ad1     | KITANGLQIVSDTQTEGNPV   | 75          |
|          |                  | Ad1     | PMKPCYGSYARPTNK        | 125         |
|          |                  | Ad1     | QPSIVLYSEDVNM          | 145         |
|          |                  | Ad1     | AMLGQQAMPNRPNYIA       | 85          |
|          |                  | Ad2     | EDEEEDEDEEEEEEE        | 555         |
|          |                  | Ad2     | EEDEEEEEEEQNARDQATKK   | 85          |
|          |                  | Ad2     | DEEEEEEEQNARDQATKKTHVY | 65          |
|          |                  | Ad2     | KKTHVYAQAPLS           | 75          |
|          |                  | Ad2     | AQAPLSGETITKSQL        | 105         |
|          |                  | Ad2     | EAEATASGGRVLKK         | 75          |
|          |                  | Ad2     | CYGSYARPTNKNGGQGI      | 58          |
|          |                  | Ad2     | RPTNKNGGQGILVA         | 88          |
|          |                  | Ad2     | GVPLPKVDLQFF           | 78          |
|          |                  | Ad2     | VPLPKVDLQFFSNTT        | 68          |
|          |                  | Ad2     | LQFFSNTTSLNDRQGNAT     | 68          |
|          |                  | Ad2     | LNDRQGNATKPKVVLY       | 248         |
| Ad2      | KPKVVLYSEDVNM    | 88      |                        |             |
| Ad2      | EDVNMETPDTHLSYK  | 138     |                        |             |
| Ad2      | METPDTHLSYKPGKG  | 128     |                        |             |
| Ad2      | AMLGQQSMPNRPNYIA | 1518    |                        |             |
| SAC      | 224600           | Ad2     | NPFGGQSVLVPDEKGV       | 73          |
| SAC      | 228071           | Ad1     | EQEEPTQEMAELEDEE       | 103         |
|          |                  | Ad1     | QPSIVLYSEDVNM          | 73          |
|          |                  | Ad1     | SKTDENSKAMLGQQAM       | 123         |
|          |                  | Ad1     | NSKAMLGQQAMPNR         | 273         |
|          |                  | Ad1     | AMLGQQAMPNRPNYIA       | 133         |

| Protocol | PTID   | Ad1/Ad2 | Sequence              | SFC/million |
|----------|--------|---------|-----------------------|-------------|
|          |        | Ad2     | AVAEDEEEEEDEEE        | 63          |
| SAC      | 228071 | Ad2     | YQPEPQIGESQWN         | 603         |
|          |        | Ad1     | APNSCEWEQEPTQ         | 185         |
|          |        | Ad1     | SCEWEQEPTQEMAE        | 195         |
|          |        | Ad1     | MAEELEDEEEAEAE        | 155         |
|          |        | Ad1     | EEAEAEAPQADQKVKKTHVY  | 55          |
|          |        | Ad1     | LQIVSDTQTEGNPVFADP    | 65          |
|          |        | Ad1     | YQPEPQVGESQWN         | 55          |
|          |        | Ad1     | CYGSYARPTNKNGGQGI     | 55          |
|          |        | Ad1     | GILVANNQGALESKV       | 175         |
| SAC      | 246281 | Ad1     | ANNQGALESKVEMQF       | 95          |
|          |        | Ad1     | YKPSKTDENSKAML        | 65          |
|          |        | Ad2     | EQTEDSGRAVAEED        | 65          |
|          |        | Ad2     | EDEEEDEDEEEEEE        | 65          |
|          |        | Ad2     | EEDEDEEEEEEQNARDQATKK | 75          |
|          |        | Ad2     | KTHVYAQAPLSGETI       | 85          |
|          |        | Ad2     | AQAPLSGETITKSGL       | 55          |
|          |        | Ad2     | LSGETITKSGLQIGS       | 55          |
|          |        | Ad2     | SDNAETQAKPVYADPSY     | 155         |
|          |        | Ad2     | AETQAKPVYADPSYQPEPQI  | 65          |
|          |        | Ad2     | TPMKPCYGSYAR          | 95          |
| SAC      | 247354 | Ad2     | CYGSYARPTNKNGGQGI     | 65          |
|          |        | Ad2     | KVVLYSEDVNMETPDTH     | 55          |
|          |        | Ad2     | METPDTHLSYKPGKG       | 55          |
|          |        | Ad1     | MAEELEDEEEAEAE        | 135         |
| SAC      | 248433 | Ad2     | LAPKGAPNSCEW          | 445         |
|          |        | Ad2     | APKGAPNSCEWEQTE       | 75          |
|          |        | Ad2     | KVVLYSEDVNMETPDTH     | 115         |
|          |        | Ad2     | YKPGKGDENSKAML        | 55          |

## **References**

1. McElrath, M.J., De Rosa, S.C., Moodie, Z., Dubey, S., Kierstead, L., Janes, H., Defawe, O.D., Carter, D.K., Hural, J., Akondy, R., et al. 2008. HIV-1 vaccine-induced immunity in the test-of-concept Step Study: a case-cohort analysis. *Lancet*.
2. Horton, H., Thomas, E.P., Stucky, J.A., Frank, I., Moodie, Z., Huang, Y., Chiu, Y.L., McElrath, M.J., and De Rosa, S.C. 2007. Optimization and validation of an 8-

color intracellular cytokine staining (ICS) assay to quantify antigen-specific T cells induced by vaccination. *J Immunol Methods* 323:39-54.

3. Aste-Amezaga, M., Bett, A.J., Wang, F., Casimiro, D.R., Antonello, J.M., Patel, D.K., Dell, E.C., Franlin, L.L., Dougherty, N.M., Bennett, P.S., et al. 2004. Quantitative adenovirus neutralization assays based on the secreted alkaline phosphatase reporter gene: application in epidemiologic studies and in the design of adenovector vaccines. *Hum Gene Ther* 15:293-304.
